# Supplementary material for: Nitrogen monoxide as dopant for enhanced selectivity of isomeric monoterpenes in drift tube ion mobility spectrometry with 3H ionization
Source: PubMed Central journal article supplement (PMC8105222; doi:10.1007/s00216-021-03306-7), 2021-04-10
Supplement: 216_2021_3306_MOESM1_ESM.pdf [file 216_2021_3306_MOESM1_ESM.pdf]

## Supplementary Information

### Nitrogen monoxide as dopant for enhanced selectivity of isomeric monoterpenes in drift tube ion mobility spectrometry with $^3\text{H}$ ionization

Rebecca Brendel, Sascha Rohn, Philipp Weller

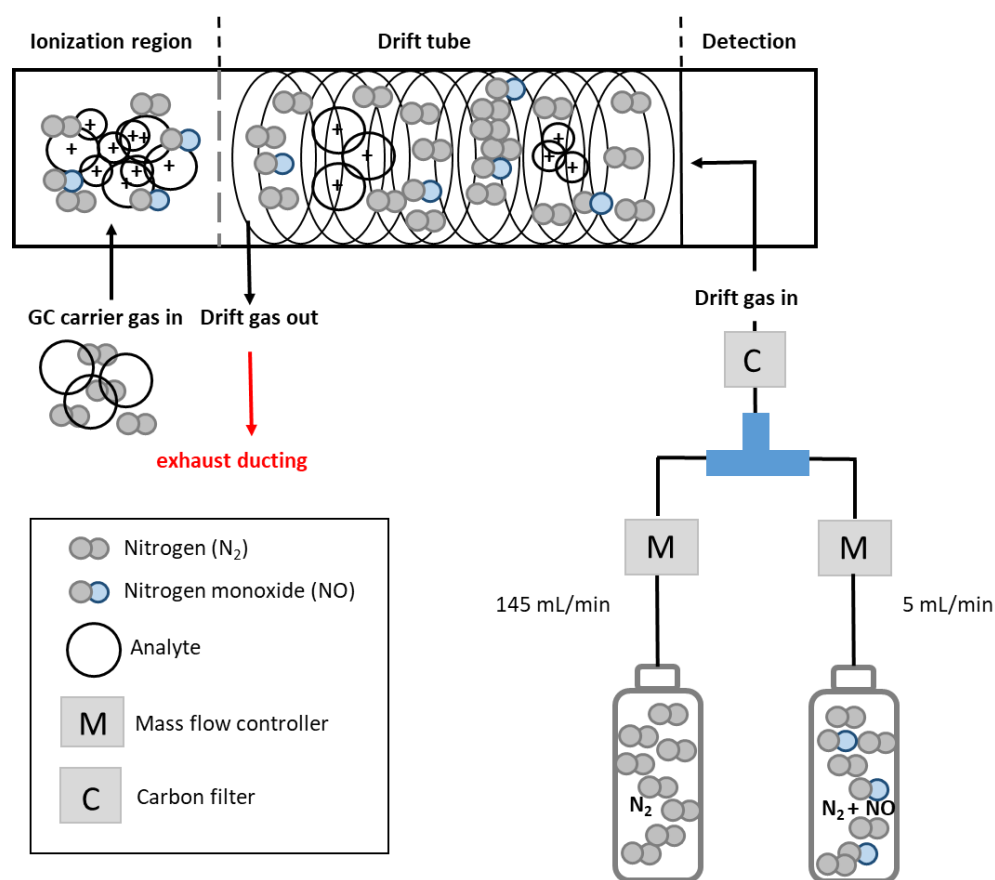

Figure S1 Schematic illustration of the instrument setup.
